# Supplementary material for: A binder free synthesis of 1D PANI and 2D MoS2nanostructured hybrid composite electrodes by the electrophoretic deposition (EPD) method for supercapacitor application
Source: Royal Society of Chemistry journal article supplement (doi:10.1039/c6ra16078f), 2016-01-01
Supplement: c6ra16078f1.pdf [file c6ra16078f1.pdf]

## Supporting Information

### A binder free synthesis of 1D PANI and 2D MoS<sub>2</sub> nanostructure hybrid composite electrodes by Electrophoretic deposition (EPD) method for supercapacitor application

Min Sik Nam<sup>‡</sup>, Umakant Patil<sup>‡</sup>, Byeongho Park, Heung Bo Sim, Seong Chan Jun\*

Nano-Electro Mechanical Device Laboratory, School of Mechanical Engineering, Yonsei University, Seoul 120-749, South Korea..

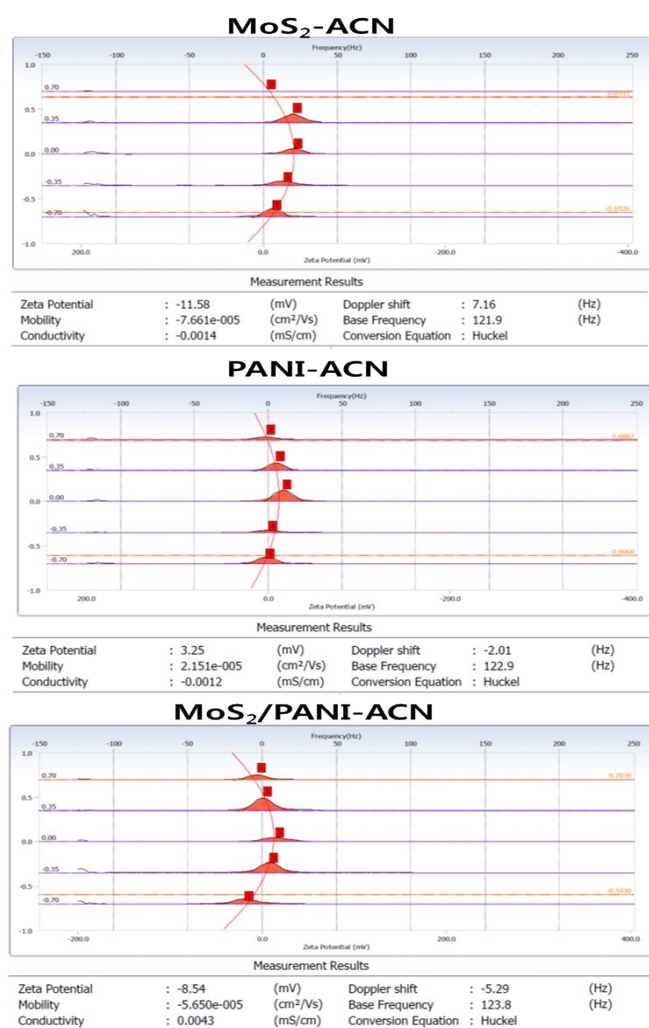

**Figure S1** Zeta potential measurement of 2D MoS<sub>2</sub> nanosheets and 1D PANI nanowires in ACN solution.

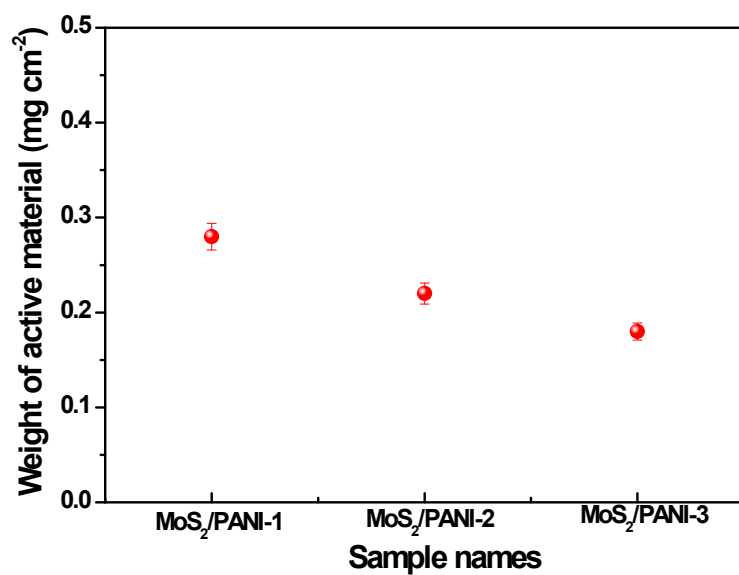

**Figure S2** Weight of active materials (with 5% error bar) for different composition of MoS<sub>2</sub>/PANI on SS electrode after 20 minute deposition.

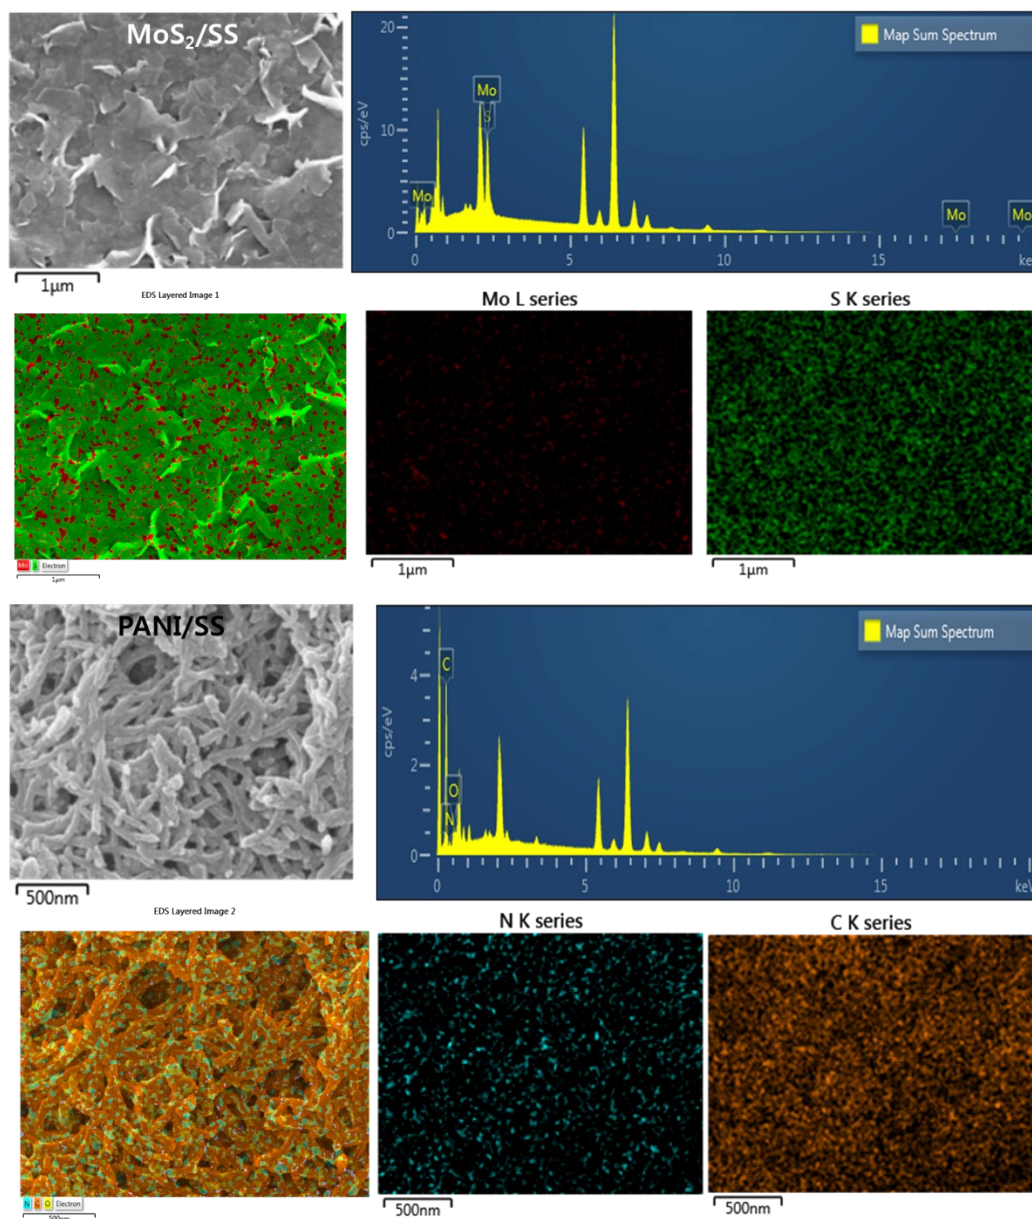

**Figure S3** FESEM-EDS mapping analysis of MoS<sub>2</sub>/SS and PANI/SS electrodes.

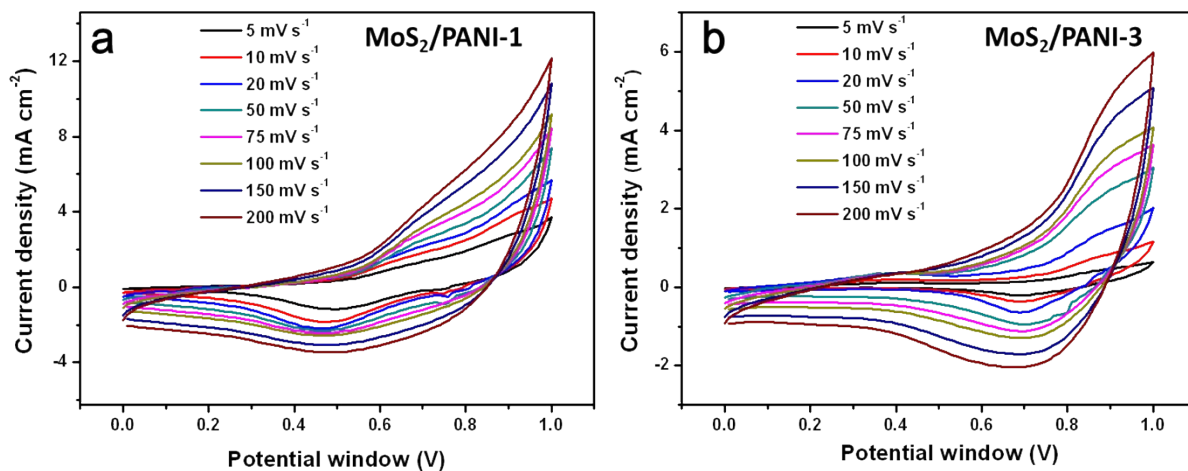

**Figure S4** Scan rate dependent (5-200 mV s<sup>-1</sup>) cyclic voltamograms of MoS<sub>2</sub>/PANI-1 and MoS<sub>2</sub>/PANI-3 electrodes in 1M Na<sub>2</sub>SO<sub>4</sub> electrolyte.
